# Supplementary material
Source: Springer Nature journal article supplement (https://www.springermedizin.de/resource/supplementary/13006_2014_180_MOESM3_ESM.pdf/9628148)

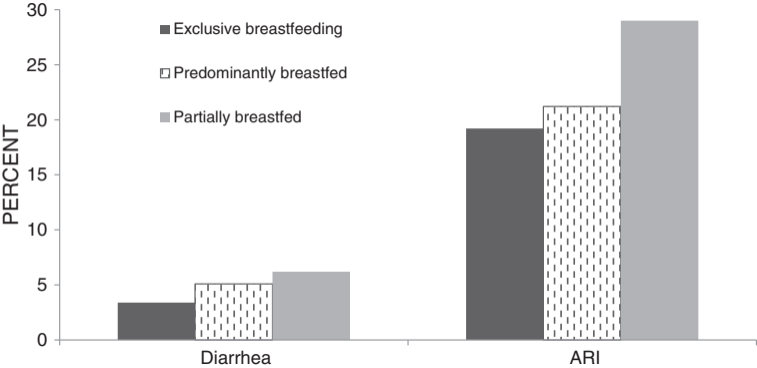

Supplement: MOESM3 [file 9628148]
